# Supplementary material
Source: publisher figshare collection journal article supplement (https://asha.figshare.com/articles/dataset/_/6170396)
Supplement: Supplementary file 1 [file 1]

This Excel spreadsheet contains more detailed information about the phonologies of the participants reported in this article. The spreadsheet contains four worksheets:

- a worksheet describing the variables available in the other worksheets;
- a worksheet containing the data for each variable for each participant;
- a worksheet summarizing the data for liquids;
- a worksheet summarizing the data for fricatives.

Variables available for misarticulated (OUT) sounds include specific sounds selected for each participant, constraint classification (i.e., positional vs. inventory), accuracy on the phonological probe in onset and coda position, repetition accuracy during the word learning task, stimulability classification, percent use of the intended substitute, and classification of consistency of the substitute. Variables available for correctly articulated (IN) sounds include specific sounds selected for each participant and accuracy on the phonological probe across positions.
